# Supplementary material for: Proteoglycan expression correlates with the phenotype of malignant and non-malignant EBV-positive B-cell lines
Source: PubMed Central journal article supplement (PMC4791248; doi:10.18632/oncotarget.5984), 2015-10-16
Supplement: oncotarget-06-43529-s001.pdf [file oncotarget-06-43529-s001.pdf]

## SUPPLEMENTARY TABLE

Supplementary Table S1: Genes expression levels in normal B cells and different EBV+/- normal and cancer lymphoid cells

| Genecell line          | SDC1        | GPC1        | HSPG2                | VCAN        | BCAN        | ACAN          | NG2         | SRGN                | DCN         | BGN         | LUM         | CD44                |
|------------------------|-------------|-------------|----------------------|-------------|-------------|---------------|-------------|---------------------|-------------|-------------|-------------|---------------------|
| <b>B cells donor 1</b> | 39,3 ± 30,1 | 66,4 ± 38,0 | 25,9 ± 7,8           | 3,7 ± 1,7   | 4,5 ± 3,4   | 34,0 ± 15,6   | 50,4 ± 19,2 | <b>269,8</b> ± 20,5 | 22,6 ± 4,3  | 60,8 ± 47,9 | 49,8 ± 7,8  | <b>374,6</b> ± 76,9 |
| <b>B cells donor 2</b> | 7,4 ± 1,2   | 9,4 ± 1,6   | 58,4 ± 14,9          | 3,6 ± 0,5   | 2,4 ± 0,2   | 0,8 ± 0,2     | 21,3 ± 6,2  | <b>309,7</b> ± 51,7 | 17,7 ± 0,2  | 11,1 ± 2,3  | 40,7 ± 6,1  | <b>560,6</b> ± 12,0 |
| <b>CMB1-Ral-STO</b>    | 3,6 ± 4,3   | 1,2 ± 1,1   | <b>219,3</b> ± 13,0  | 7,9 ± 9,4   | 7,4 ± 9,4   | 4,7 ± 6,1     | 0,6 ± 0,6   | <b>684,3</b> ± 28,7 | 0,14 ± 0,11 | 2,2 ± 2,3   | 0,9 ± 1,0   | 4,13 ± 2,8          |
| <b>CBC-JK2-STO</b>     | 3,5 ± 1,5   | 1,5 ± 1,2   | <b>448,8</b> ± 142,9 | 13,0 ± 6,2  | 9,1 ± 8,2   | 10,8 ± 14     | 0,61 ± 0,32 | <b>447,4</b> ± 1,1  | 0,11 ± 0,03 | 2,9 ± 2,6   | 1,0 ± 0,4   | 27,7 ± 4,6          |
| <b>Nad20</b>           | 4,9 ± 4,6   | 1,6 ± 1,3   | <b>245,4</b> ± 22,6  | 7,8 ± 9,66  | 6,5 ± 8,3   | 2,5 ± 3,3     | 0,6 ± 0,7   | <b>741,2</b> ± 16,6 | 0,06 ± 0,02 | 2,0 ± 2,1   | 1,1 ± 1,3   | 62,8 ± 40,7         |
| <b>Raji</b>            | 1,29 ± 0,8  | 2,3 ± 2,1   | <b>296,2</b> ± 9,4   | 13,5 ± 6,8  | 5,4 ± 3,9   | 4,8 ± 4,8     | 0,4 ± 0,2   | 37,2 ± 22,2         | 0,08 ± 0,04 | 1,9 ± 1,4   | 0,7 ± 0,6   | 0,5 ± 0,3           |
| <b>Daudi</b>           | 2,1 ± 1,5   | 2,8 ± 1,5   | <b>376,7</b> ± 31,2  | 7,3 ± 6,2   | 8,8 ± 7,8   | 2,3 ± 3,1     | 0,96 ± 0,53 | 4,9 ± 0,1           | 0,1 ± 0,08  | 4,3 ± 4,3   | 1,3 ± 0,9   | 1,6 ± 0,8           |
| <b>Mutu III cl99</b>   | 0,5 ± 0,6   | 0,7 ± 0,7   | 53,8 ± 25,5          | 1,3 ± 1,0   | 0,4 ± 0,2   | 0,2 ± 0,1     | 0,18 ± 0,07 | 49,3 ± 4,5          | 0,06 ± 0,04 | 1,2 ± 1,0   | 0,2 ± 0,1   | 0,4 ± 0,2           |
| <b>Rael</b>            | 0,07 ± 0,08 | 1,2 ± 1,1   | 27,6 ± 3,7           | 0,2 ± 0,2   | 0,14 ± 0,06 | 0,007 ± 0,008 | 0,09 ± 0,06 | 6,2 ± 4,9           | 0,03 ± 0,04 | 0,23 ± 0,22 | 0,1 ± 0,04  | 0,11 ± 0,02         |
| <b>Akata</b>           | 1,2 ± 0,1   | 0,9 ± 0,1   | 96,0 ± 28,0          | 5,0 ± 1,1   | 5,2 ± 4,9   | 1,1 ± 1,1     | 1,0 ± 1,1   | 5,8 ± 1,9           | 0,06 ± 0,07 | 2,2 ± 1,0   | 1,3 ± 0,4   | 1,06 ± 0,07         |
| <b>Mutu I cl 148</b>   | 0,02 ± 0,02 | 0,7 ± 0,4   | 0,31 ± 0,07          | 0,02 ± 0,02 | 0,07 ± 0,03 | 0,1 ± 0,2     | 0,07 ± 0,01 | 0,910 ± ,03         | 0,02 ± 0,02 | 0,06 ± 0,01 | 0,03 ± 0,02 | 0,07 ± 0,03         |
| <b>DG75</b>            | 8,0 ± 0,3   | 13,2 ± 9,3  | 4,5 ± 0,5            | 0,54 ± 0,05 | 1,3 ± 0,6   | 9,2 ± 5,8     | 7,2 ± 0,5   | 33,2 ± 0,6          | 3,6 ± 1,0   | 11,5 ± 7,9  | 11,2 ± 7,9  | 6,1 ± 1,9           |
